# Supplementary material for: Hydrous ruthenium oxide triggers template-free and spontaneous growth of metal nanostructures
Source: Royal Society of Chemistry journal article supplement (doi:10.1039/d3sc05644a), 2023-12-19
Supplement: d3sc05644a1.pdf [file d3sc05644a1.pdf]

## Supporting Information

### Hydrous Ruthenium Oxide Triggers Template-free and Spontaneous Growth of Metal Nanostructures

Faheem Muhammad<sup>a,#</sup>, Xiwen Chen<sup>a,#</sup>, Jiayi Tang<sup>a,#</sup>, Yuan Cheng<sup>a</sup>, Yuyang Li<sup>b</sup>, Chenxin Zhu<sup>a</sup>, Yihong Zhang<sup>a</sup>, Leiyang Miao<sup>b</sup>, Yu Deng<sup>a</sup>, Hui Wei<sup>a,c\*</sup>

<sup>a</sup>*College of Engineering and Applied Sciences, Nanjing National Laboratory of Microstructures, Jiangsu Key Laboratory of Artificial Functional Materials, Nanjing University, Nanjing, Jiangsu 210023, China.*

<sup>b</sup>*Department of Cariology and Endodontics, Nanjing Stomatological Hospital, Medical School of Nanjing University, Nanjing, 210008, China.*

<sup>c</sup>*State Key Laboratory of Analytical Chemistry for Life Science, School of Chemistry and Chemical Engineering, Chemistry and Biomedicine Innovation Center (ChemBIC), Nanjing University, Nanjing, Jiangsu 210023, China.*

# These authors contributed equally to this work.

**Chemicals and reagents.** Ruthenium chloride hydrate ( $\text{RuCl}_3 \cdot x\text{H}_2\text{O}$ ), potassium tetrachloroplatinate (II) ( $\text{K}_2\text{PtCl}_6$ ), silver nitrate ( $\text{AgNO}_3$ ), chloroauric acid ( $\text{HAuCl}_4 \cdot 4\text{H}_2\text{O}$ ), sodium hydroxide ( $\text{NaOH}$ ), ammonium hydroxide (25%  $\text{NH}_4\text{OH}$ ), Citric acid monohydrate ( $\text{C}_6\text{H}_8\text{O}_7 \cdot \text{H}_2\text{O}$ ), acetone and commercial  $\text{RuO}_2$  were purchased from Aladdin Chemical Co. Ltd. (Shanghai, China). Hoechst 33342 staining solution, dimethyl sulfoxide (DMSO), and Cell Counting Kit-8 (CCK-8) were acquired from Beyotime, China. Colitis grade dextran sulfate sodium (DSS, 36~50 kDa) was purchased from MP Biomedicals, USA. 2,4,6-Trinitrobenzenesulfonic acid (5% (w/v) in  $\text{H}_2\text{O}$ ) was purchased from Innochem, China. 2',7'-Dichlorodihydrofluorescein diacetate (DCFH-DA) was obtained from MedChemExpress, USA. All other reagents and chemicals were purchased from commercial sources and used as received. Deionized water (18.2 M $\Omega$ -cm, Millipore) and absolute ethanol were used throughout the experiments.

**Material characterizations.** The structural parameters of the materials were investigated using a transmission electron microscope (TEM, FEI TECNAI G2 F20 200 kV, and JOEL, JEM-2800). High-angle annular dark-field scanning transmission electron microscopy (HAADF-STEM) imaging and electron energy-loss spectroscopic (EELS) analysis were carried out on an aberration-corrected STEM Titan Cubed G2 300 system. Powder XRD patterns were recorded using a diffractometer (Bruker-AXS, Germany) with a  $\text{Cu K}\alpha$  radiation. The elemental compositions were determined by an inductively coupled plasma optical emission spectrometer (CP-OES, iCAP 7200, Thermo, USA). X-ray photoelectron spectroscopic (XPS) investigations were performed by a Thermo Scientific K-Alpha spectrometer (Al  $\text{K}\alpha$  (1486 eV) using a hemispherical energy analyzer; the binding energy was calibrated by C1s at 284.8 eV. UV-vis absorption spectra were obtained using a UV-vis spectrophotometer with a 1 cm quartz cell (Shimadzu Co., Japan) and with a microplate reader (SpectraMax M2e, Molecular Device, USA). Zeta potentials were measured at 25 °C using a Malvern Zetasizer Nano ZS90. For catalase-like activity testing, the generated oxygen (milligram per liter) was monitored using a dissolved oxygen meter (SevenExcellence Multiparameter, Mettler Toledo Co. Ltd.). Raman characterization was performed on an HY LabRAM Evolution Raman Microscope with a 633 nm laser source to analyze the Raman signals of the  $\text{RuO}_2$  samples. Thermogravimetric analysis was carried out using a Pyris DSC/0.2 uW (PerkinElmer, USA) instrument. Ultraviolet photoelectron spectroscopy (UPS) was performed using a Thermo Scientific Nexsa G2 X-ray photoelectron spectrometer (XPS) system (USA). A Thermo Scientific Nicolet iS 5 FTIR Spectrometer (USA) was used for FTIR analysis.

**Synthesis of ultrasmall hydrous  $\text{RuO}_2$  NPs.** Citric acid monohydrate (100 mg, 0.47 mmol) was dissolved in 200 mL of water at room temperature, followed by the introduction of ruthenium chloride hydrate (100 mg) under stirring. After the complete dissolution of both precursors, the pH of the solution was increased to 10 with the dropwise addition of  $\text{NaOH}$  solution. The temperature of the resulting forest green-colored solution was subsequently elevated to 80 °C. Following 60 min of stirring at 80 °C, acetone (200-300 mL) was added to facilitate the flocculation process; the product was then collected by centrifugation (10000 rpm, 10 min) and washed twice with deionized water to remove any unreacted salts. A portion of the freshly prepared wet  $\text{RuO}_2$  product was dispersed in water under sonication, whereas the remaining product was dried at 60 °C overnight for further characterization.

**Synthesis of  $\text{RuO}_2$ @Ag nanostructures.** Unlike conventional methods, we exploited the redox-active nature of H- $\text{RuO}_2$  NPs to grow Ag NPs. Ten milligrams of an aqueous solution of as-synthesized H- $\text{RuO}_2$  NPs (200  $\mu\text{g}/\text{mL}$ ) were placed in a beaker containing a stirring bar, and then 1 mL of  $\text{AgNO}_3$  (10 mg/mL) was added while stirring at room temperature for 24 h. The collected product was analyzed by TEM to track the growth of Ag NPs at different points in time. Synthesis was also performed under alkaline conditions (pH 9).  $\text{NH}_4\text{OH}$  was first added to adjust the pH of the aqueous solution of H- $\text{RuO}_2$  NPs,

followed by the addition of  $\text{AgNO}_3$ . Continuous stirring of the solution for 3 h resulted in the formation of the Ag-studded  $\text{RuO}_2$  darkish product, suggesting the successful synthesis of Ag NPs. The product was collected via centrifugation and washed with deionized water to remove unreacted precursors.

**Synthesis of  $\text{RuO}_2$ @Au nanostructures.** An aqueous solution (10 mL) of the as-synthesized H- $\text{RuO}_2$  NPs (200  $\mu\text{g}/\text{mL}$ ) was first introduced into three 20 mL vials with stirring bars. To produce gold with different sizes and nanostructures, the pH of the solutions was varied; the pH of one of the vials remained undisturbed, whereas the pH of the other two vials was changed to 5.0 and 9.0 by adding NaOH solution. Then, 1 mL of  $\text{HAuCl}_4 \cdot 4\text{H}_2\text{O}$  (2 mg/mL) was added to each vial while stirring at room temperature. Even though the color of the solutions changed within minutes upon adding the  $\text{HAuCl}_4$  solution. The reaction was continued for 24 h to track the growth of the self-assembled Au nanostructure at pH 9.0. The different colored products generated at varied pH implied the successful synthesis of Au nanostructures with different sizes/structures. The product was collected via centrifugation and washed with deionized water.

**Synthesis of  $\text{RuO}_2$ @Pt nanostructures.** Similarly, an aqueous solution (10 mL) of the as-synthesized H- $\text{RuO}_2$  NPs (200  $\mu\text{g}/\text{mL}$ ) was first added into 20 mL vials with a stirring bar, followed by the addition of 1 mL of  $\text{K}_2\text{PtCl}_4$  aqueous solution (2 mg/mL) under stirring at room temperature. After stirring for 24 h, the collected product was analyzed by TEM at different time points. In another attempt, we increased the temperature of the reaction medium to 80 °C and stirred the solution for 30 min until a significant change in the color of the solution was observed. The product was finally collected via centrifugation and washed with deionized water.

**Surface modification of commercial  $\text{RuO}_2$  NPs.** Commercial  $\text{RuO}_2$  (100 mg) was dispersed into 20 mL of deionized water under intense sonication, followed by the addition of 10 mg sodium citrate. The sample was stirred for 1 h, centrifuged, and washed thrice with water and ethanol.

**Synthesis of Pt nanoparticles.** In a typical procedure, PVP K30 (266 mg) was dissolved in 90 mL of methanol under magnetic stirring, followed by the addition of 10 mL of 50 mM  $\text{H}_2\text{PtCl}_6$ . The solution was then refluxed for 3 h under vigorous stirring. Afterward, the solution was subjected to rotary evaporation to evaporate the methanol. Pt NPs were precipitated by acetone and then redispersed in water for further use.

**Synthesis of  $\text{Fe}_3\text{O}_4$  nanoparticles.** Iron trichloride hexahydrate (700 mg) was dissolved in 20 mL of ethylene glycol, followed by adding 280 mg trisodium citrate under vigorous stirring. After the complete dissolution of both salts, 1.20 g anhydrous sodium acetate was added while stirring the solution. The obtained yellow solution was sealed in an autoclave. The solution was heated in an oven at 200 °C for 10 h. The product was recovered with magnetic separation and then washed multiple times with water and ethanol.

**SOD-like activity measurements.** The SOD-like activity of different  $\text{RuO}_2$  and H- $\text{RuO}_2$ @metal nanostructures was evaluated using a SOD assay kit (Dojindo, Japan).<sup>[1]</sup> In principle, the xanthine oxidase (XO) catalyzes the reaction between water-soluble tetrazolium WST-1 and  $\text{O}_2^-$  to generate a formazan dye. The SOD-like nanozyme inhibits the reaction, thus enabling to colorimetrically detect the activity. First, 20  $\mu\text{L}$  of each material with a specific concentration was mixed with 200  $\mu\text{L}$  of working solution in a microplate well. Next, the enzyme working solution (20  $\mu\text{L}$ ) was introduced, followed by a 20 min incubation at 37 °C. The absorbance at 450 nm was measured using a multiple plate reader (Tecan Infinite 200 Pro). The quenching rate of the superoxide radical was calculated by measuring the inhibition in color development. The analysis was performed in replicates ( $n = 3$ ).

**CAT-like activity measurements.** The CAT-like activity of different  $\text{RuO}_2$  and H- $\text{RuO}_2$ @metal

nanostructures was measured by observing the amount of dissolved oxygen generated with an oxygen meter. Briefly, each material and H<sub>2</sub>O<sub>2</sub> were successively added to 6 mL of water. The concentration of RuO<sub>2</sub>-based materials was set to 20 µg/mL, and the final concentration of H<sub>2</sub>O<sub>2</sub> was maintained at 5 mM. The amount of catalase-like nanozyme-mediated generation of oxygen (milligram per liter) was monitored for up to 10 min.

**Catalytic kinetics of catalase-like nanostructures.** The catalytic kinetics of catalase-like nanostructures were evaluated using an oxygen electrode. Typically, H-RuO<sub>2</sub> and H-RuO<sub>2</sub>@metal nanozymes were added to 2.5 mM, 5 mM, 10 mM, 20 mM, 40 mM, and 80 mM H<sub>2</sub>O<sub>2</sub> solutions, and the production of oxygen was monitored by an oxygen electrode. The final concentration of H-RuO<sub>2</sub> and H-RuO<sub>2</sub>@metal nanozyme was 1 µg/mL. The concentration of dissolved oxygen was recorded every 5 sec within 1 min. Three repeated measurements were conducted under different concentrations of H<sub>2</sub>O<sub>2</sub>. Six initial velocities (V<sub>0</sub>) were calculated using linear fitting. Afterward, the plot of the six V<sub>0</sub> versus the corresponding [H<sub>2</sub>O<sub>2</sub>] was fitted using the Michaelis–Menten equation.

**Catalase-like activity at different pH values.** Typically, 1 µg/mL H-RuO<sub>2</sub>@metal nanozymes were added to a 5 mM H<sub>2</sub>O<sub>2</sub> solution, and the production of oxygen was monitored by an oxygen electrode. The concentration of dissolved oxygen was recorded every 30 sec within 5 min. The curves of dissolved oxygen versus time were plotted.

**Peroxidase-mimicking activity at different pH values.** The optimized pH for peroxidase-mimicking activities of H-RuO<sub>2</sub> and H-RuO<sub>2</sub>@metal was evaluated by comparing the initial velocity (V<sub>0</sub>) of the catalysis of 3,3',5,5'-tetramethylbenzidine (TMB) in the presence of H<sub>2</sub>O<sub>2</sub>. Typically, 0.02 mM TMB, 1 µg/mL nanozyme materials, and 5 mM H<sub>2</sub>O<sub>2</sub> were added in sequence to a cuvette with a final solution of 3 mL. After the addition of H<sub>2</sub>O<sub>2</sub>, the reactants were quickly mixed with a pipette, and the absorbance under 652 nm was monitored by a spectrophotometer. The initial velocity was calculated based on the Beer–Lambert law. The curve of V<sub>0</sub> versus pH was plotted. Similarly, the peroxidase-mimicking activity of Pt NPs and Fe<sub>3</sub>O<sub>4</sub> NPs at different pH values was evaluated following the same protocol described above.

**Cell culture and cytotoxicity of RuO<sub>2</sub>@metal nanozymes.** RAW 264.7 cells were obtained from the cell bank of the Chinese Academy of Sciences (Shanghai, China). Cells were cultured in high glucose-DMEM (Bio-Channel, China) containing 10% (v/v) FBS and 1% penicillin/streptomycin (Cytiva, USA) in a humidified 5% CO<sub>2</sub> atmosphere at 37 °C. To evaluate the cell viability, Raw 264.7 cells were seeded into 96-well plates at a density of 5×10<sup>3</sup> cells per well. The medium was refreshed after overnight incubation, followed by the addition of various H-RuO<sub>2</sub>-based nanozymes with different concentrations (0–100 µg/mL). Following incubation for another 24 h, the cells were washed with PBS three times. Cell viability was determined by a CCK (Cell Counting Kit)-8 assay (n = 3), according to the manufacturer's instructions using a microplate reader (Tecan Infinite 200 Pro).

$$\text{Viability} = (O_t - O_b) / (O_c - O_b) * 100\%$$

where O<sub>t</sub> is the absorbance of the testing samples, O<sub>b</sub> is the absorbance of the blank groups (with no cells) and O<sub>c</sub> is the absorbance of the control groups.

**ROS scavenging activities of RuO<sub>2</sub>@metal nanozymes.** RAW264.7 cells were seeded at 1×10<sup>4</sup> cells per well in 12-well plates. After one day, a refreshed growth medium containing 25 µg/mL of H-RuO<sub>2</sub>@metal nanozymes was added to cells and incubated for three additional hours. Cells were washed thrice with PBS, and then H<sub>2</sub>O<sub>2</sub> (final concentration of 100 µM) was added to each well to stimulate all groups for 30 min except the negative control group. Following stimulation, the RAW 264.7 cells were incubated with DCFH-DA and Hoechst for 20 min, washed with PBS three times to remove

excess probes, and finally observed using a fluorescence-inverted microscope (Leica, Germany). The excitation wavelength was 488 nm. In addition to examination by a fluorescent microscope, H<sub>2</sub>O<sub>2</sub>-stimulated and DCFH-DA-incubated cells were also collected by centrifugation and analyzed by flow cytometry (cytoFLEX Flow Cytometer, USA). In principle, DCFH was transformed into the fluorescent product dichlorofluorescein in the presence of ROS, thus enabling us to gauge the quantity of intracellular ROS level.

***In vitro* anti-inflammatory effect.** After RAW264.7 cells were seeded at a density of  $1 \times 10^5$  cells per well in 6-well plates for 24 h, various H-RuO<sub>2</sub>@metal nanozymes at 10 µg/mL were added and incubated overnight. After washing the cells to remove the excess materials, 20 ng/mL LPS was introduced into the cells and incubated for 12 h. Following the manufacturer's instructions (Invitrogen), total RNA was extracted from the cells with TRIzol. Subsequently, the mRNA levels of pro-inflammatory M1 markers (IL-1β, IL-6, and TNF-α) and anti-inflammatory M2 markers (IL-10, TGF-β, and Arg-1) were determined using qRT-PCR.

***In vivo* anti-inflammatory therapies.** All animal studies were approved by the Institutional Animal Care and Use Committee (IACUC) of Nanjing University. To establish the two IBD models, male C57BL/6 mice weighing an average of 18-20 g were used. The mice were acclimatized for 7 days and randomly divided into various groups with five mice per group (n = 5). First, the CD disease model of mice was established with TNBS, and then the anti-inflammatory activities of H-RuO<sub>2</sub>-based nanozymes were evaluated.<sup>[2]</sup> On the first day, 1 wt % TNBS solution was absorbed through the skin to presensitize the mice. Then, on day 8, mice were treated with 2.5 wt% TNBS enema, followed by the administration of nanozymes via the oral route once a day on three consecutive days (9<sup>th</sup>, 10<sup>th</sup>, and 11<sup>th</sup> day). The mice in all groups were sacrificed after anesthetization with diethyl ether on the 12<sup>th</sup> day. To establish an ulcerative colitis (UC) model, mice were fed 2% wt. DSS solution for six consecutive days, leaving one group as a control. The mice with DSS-induced UC were aseptically and orally administered H-RuO<sub>2</sub>-based nanozymes once a day on three consecutive days (7<sup>th</sup>, 8<sup>th</sup>, and 9<sup>th</sup>). The mice in all groups were sacrificed after anesthetization with diethyl ether on day 10. The length of the whole colon was recorded. Pathological examination and cytokine quantification with ELISA kits were performed to evaluate the therapeutic efficacy of the tested materials. Colon tissues from all groups were fixed with 10% formalin, processed, dried, embedded in paraffin, sectioned at a thickness of 4 µm, and stained with hematoxylin and eosin (H&E). The stained tissues were examined and photographed using an optical microscope. Proinflammatory cytokine evaluation (TNF-α and IL-1β) in colon homogenate was performed by homogenizing the colon tissue with a length of about 5 mm from each mouse in 1.5 mL of saline at 4 °C. The resultant homogenate was centrifuged at 2000 rpm for 20 min at 4 °C, and the supernatant was collected for evaluation. Mouse IL-1β and TNF-α ELISA Kits (Neobioscience Technology Co. Ltd., China) were used to quantify the amounts of IL-1β and TNF-α in the homogenate of colon tissues, respectively.

***Biodistribution of H-RuO<sub>2</sub>@metal nanostructures.*** Male C57BL/6 mice were divided randomly into different groups with 5 mice per group, receiving oral administration of H-RuO<sub>2</sub> and H-RuO<sub>2</sub>@Ag nanozymes at a dosage of 5 mg/kg body weight. After different periods (*i.e.*, 12, 24, 48, and 72 h), the mice were sacrificed, and their blood, feces, heart, liver, spleen, lung, kidney, and colon were collected, weighed, boiled, and degraded with nitric acid. The content of silver in those samples was determined with an inductively coupled plasma optical emission spectrometer.

***Statistical analysis.*** All experiments were performed in quintuplicate, and statistical analysis was performed using GraphPad Prism. One-way ANOVA was used for all other multiple-group comparisons. All the data are expressed as mean ± SD (n=5). Significant *P*-values are shown with asterisks, and *P*-

values less than 0.0001, 0.001, 0.01, and 0.05 are shown with three (\*\*\*\*), three (\*\*\*) two (\*\*), one asterisk (\*) and n.s (not significant) vs. control group, respectively.

## Results and Discussion

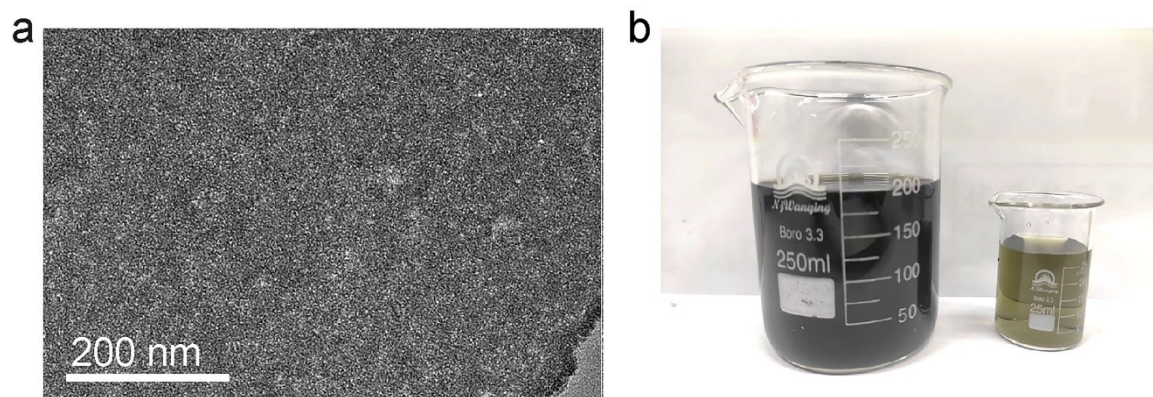

**Fig. S1** (a) Low-resolution TEM image and (b) digital photo of solutions illustrating the well-dispersed, ultrasmall, and large-scale synthesis of citrate-modified H-RuO<sub>2</sub> NPs. A small beaker shows the concentration of the solution after 1/20 dilution with deionized water.

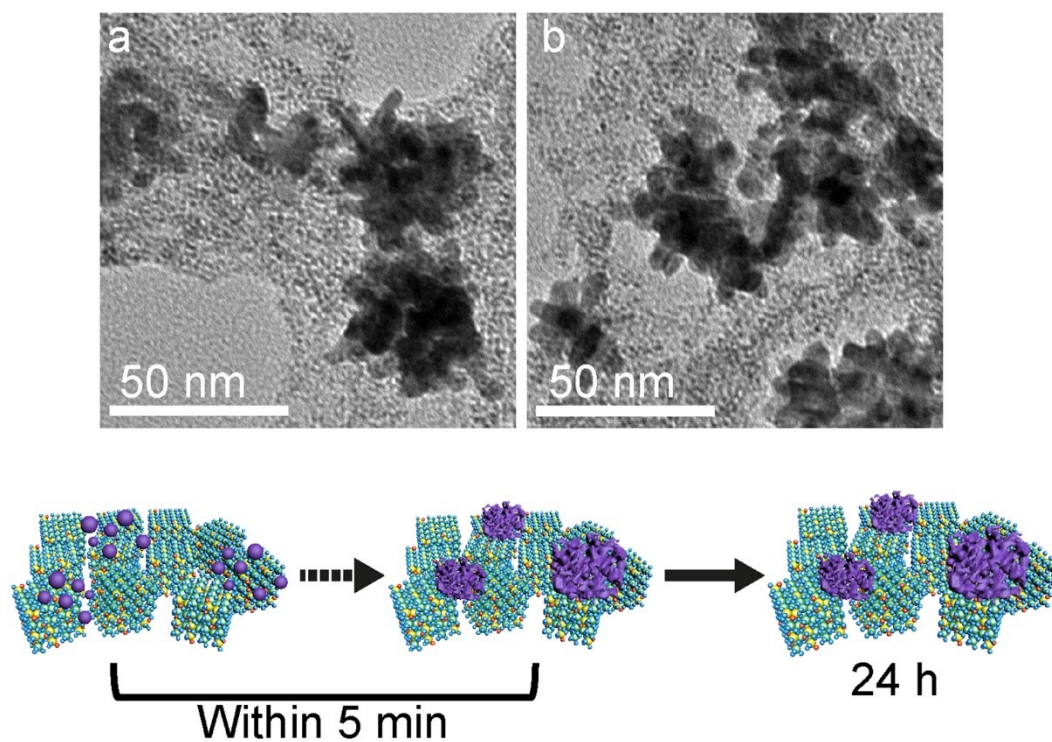

**Fig. S2** Tracking the growth of self-assembled Au onto the surface of H-RuO<sub>2</sub> while increasing the reaction time. TEM images of H-RuO<sub>2</sub>@ self-assembled Au analyzed after (a) 5 min and (b) after 24 h.

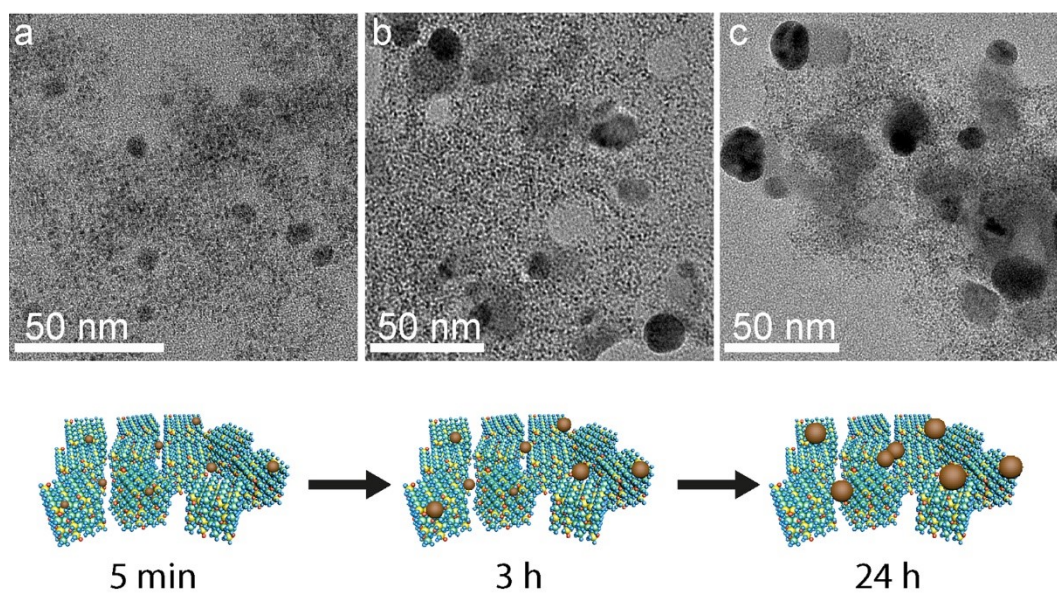

**Fig. S3** Tracking the growth of Ag NPs onto the surface of H-RuO<sub>2</sub> while increasing the reaction time. TEM images of H-RuO<sub>2</sub>@Ag NPs analyzed after (a) 5 min, (b) 3 h, and (c) 24 h.

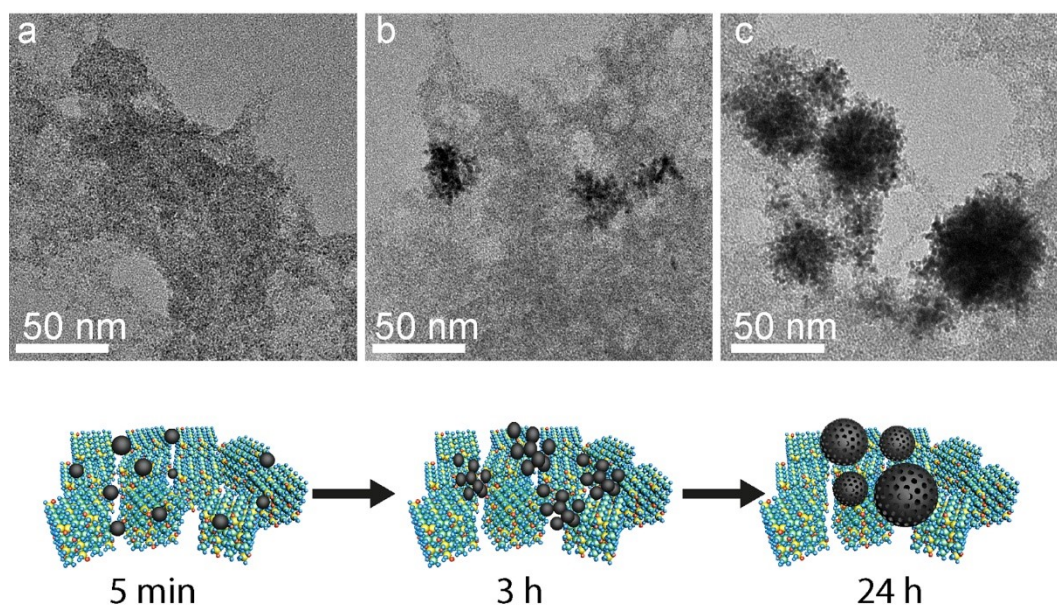

**Fig. S4** Tracking the growth of Pt NPs onto the surface of H-RuO<sub>2</sub> while increasing the reaction time. TEM images of H-RuO<sub>2</sub>@Pt NPs analyzed after (a) 5 min, (b) 3 h, and (c) 24 h.



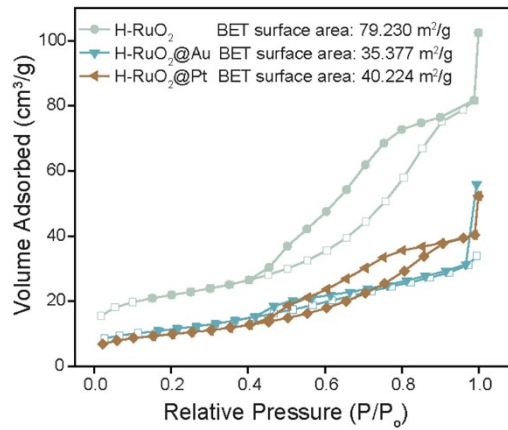

**Fig. S5** Nitrogen adsorption isotherms of H-RuO<sub>2</sub>, H-RuO<sub>2</sub>@Au, and H-RuO<sub>2</sub>@Pt. The BET data indicate a decrease in the surface area of H-RuO<sub>2</sub> after the growth of noble metals due to slight aggregation of H-RuO<sub>2</sub> and the loading of heavier metals such as Au and Pt.

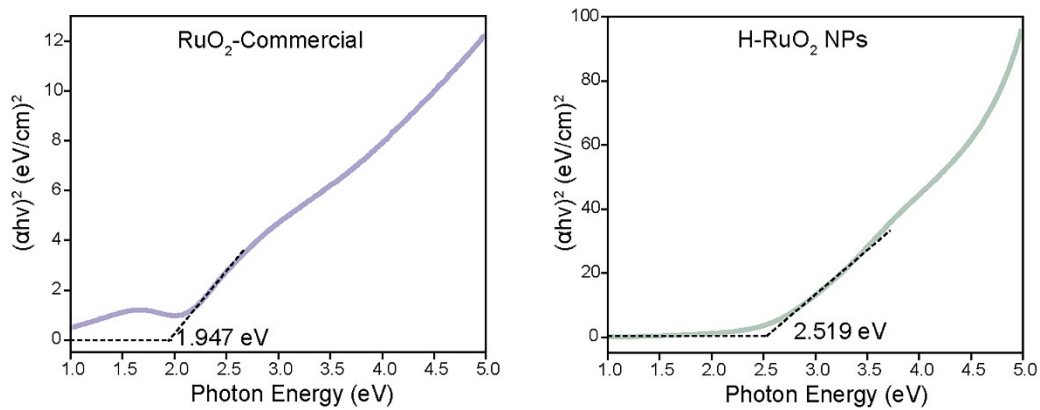

**Fig. S6** Band gaps ( $E_g$ ) of commercial and H-RuO<sub>2</sub> samples, calculated using the Tauc plot method.

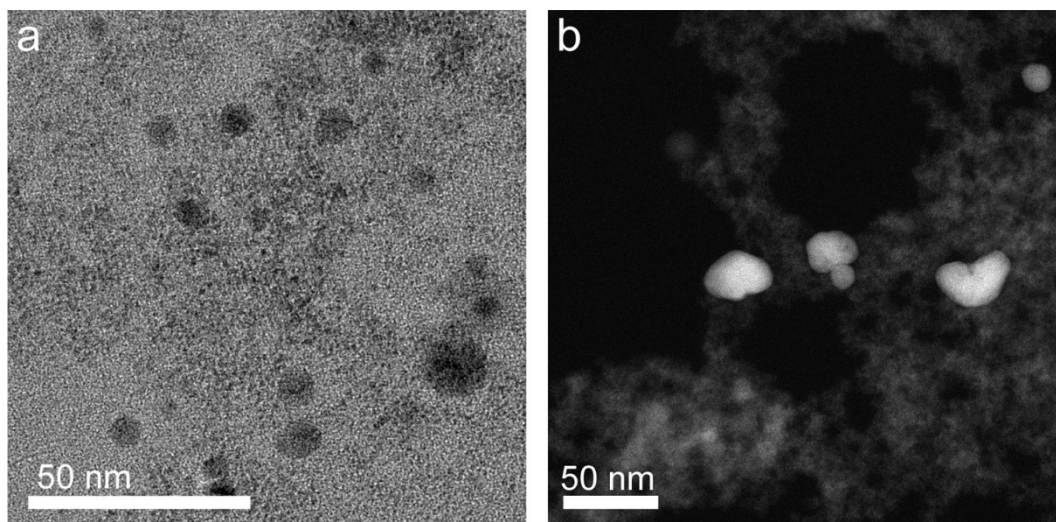

**Fig. S7** Demonstrating the growth of Ag nanostructures under alkaline conditions. (a and b) TEM and HAADF-STEM images of Ag NPs grown onto the surface of H-RuO<sub>2</sub> NPs under alkaline conditions (pH 9.0). Upon mixing AgNO<sub>3</sub> into NH<sub>4</sub>OH solution to achieve pH 9.0, a positively charged [Ag (NH<sub>3</sub>)<sub>2</sub>]<sup>+</sup> complex was *in situ* produced which reacted with the RuO<sub>2</sub> surface, and as a result, Ag NPs were produced.<sup>[3]</sup>

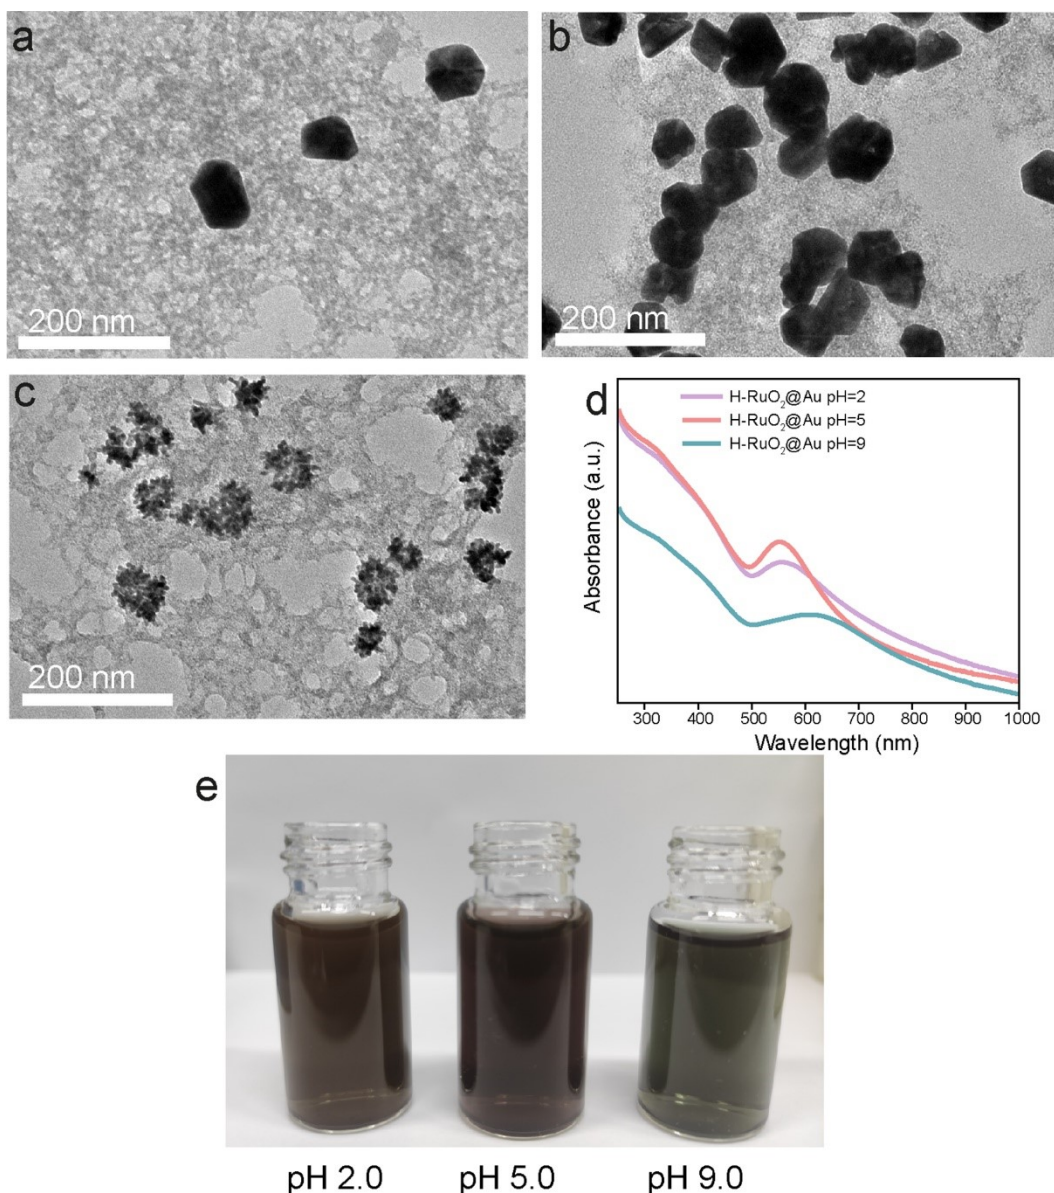

**Fig. S8** Demonstrating the growth of Au nanostructures onto the surface of H-RuO<sub>2</sub> NPs under varying pH conditions. (a-c) TEM images of the samples prepared without pH change at pH 5.0 and pH 9.0. (d and e) Absorption spectra and the corresponding digital images of the H-RuO<sub>2</sub>@Au samples prepared under varied pH conditions. Under alkaline conditions, HAuCl<sub>4</sub> was transformed into different negatively charged hydroxylated species, such as AuCl<sub>3</sub>(OH)<sup>-</sup>, AuCl<sub>2</sub>(OH)<sub>2</sub><sup>-</sup>, and AuCl(OH)<sub>3</sub><sup>-</sup>.<sup>[4]</sup>

The samples produced at pH 2.0 and 5.0 showed strong absorption bands peaked at ~ 550 nm. In contrast, the synthesis under alkaline conditions led to a red shift of LSPR from 550 to 614 nm, accompanied by a decrease in intensity and an increase in full width at half-maximum. This red shift and broadening of the SPR peak observed in self-assembled Au were attributed to the collective electromagnetic response (delocalization of surface electrons) of self-assembled Au NPs to visible light.

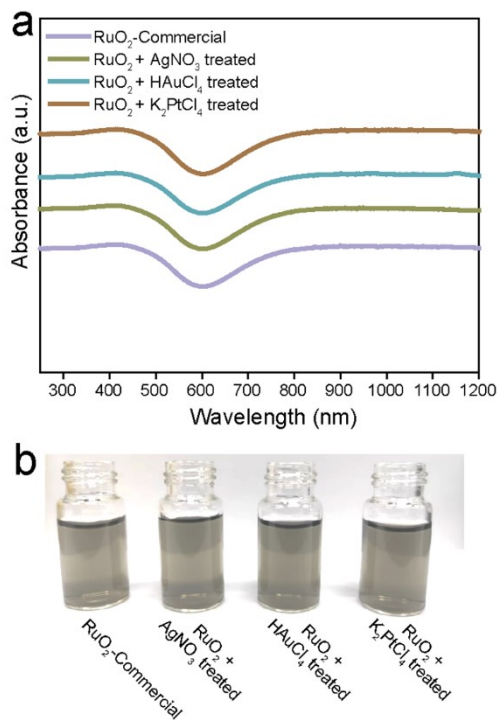

**Fig. S9** Demonstrating the redox inactive nature of commercial  $\text{RuO}_2$ . (a) Absorption spectra of commercial  $\text{RuO}_2$  before and after incubation with different metal precursors under the similar specified experimental conditions used in the case of H- $\text{RuO}_2$  NPs. (b) Corresponding digital photo of the samples from left to right: commercial  $\text{RuO}_2$  and samples after treatment with  $\text{AgNO}_3$ ,  $\text{HAuCl}_4$ , and  $\text{K}_2\text{PtCl}_4$ .

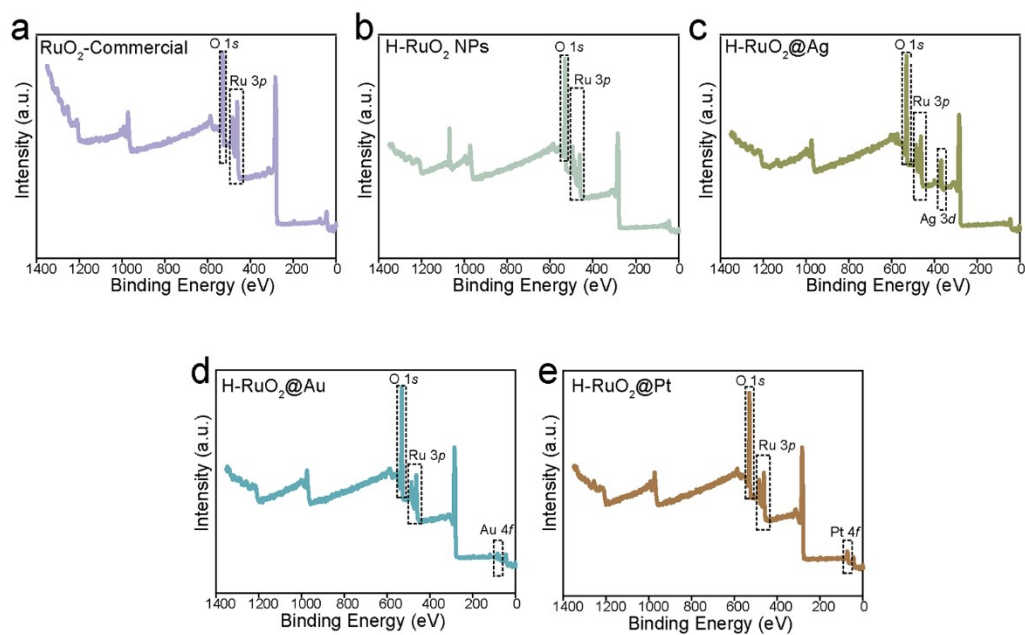

**Fig. S10** XPS survey spectra. (a) Commercial  $\text{RuO}_2$  NPs. (b) H- $\text{RuO}_2$  NPs. (c) H- $\text{RuO}_2$ @Ag. (d) H- $\text{RuO}_2$ @Au. (e) H- $\text{RuO}_2$ @Pt nanostructures.

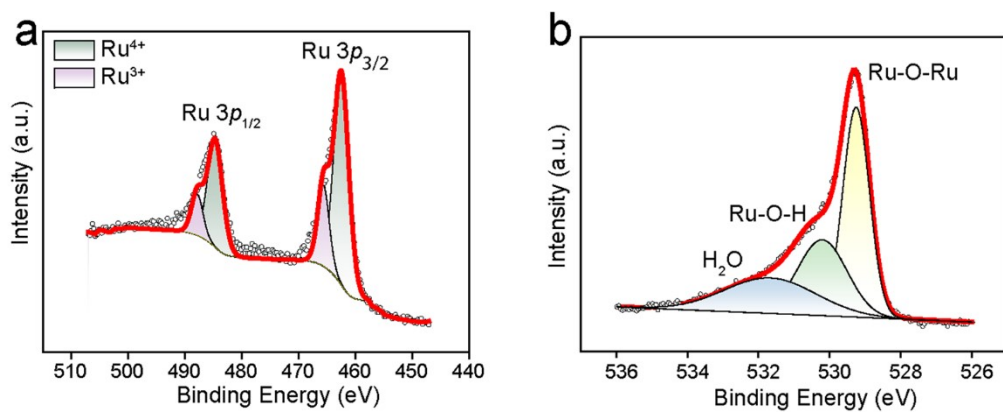

**Fig. S11** High-resolution XPS spectra of commercial RuO<sub>2</sub>. (a and b) Ru 3p and O 1s.

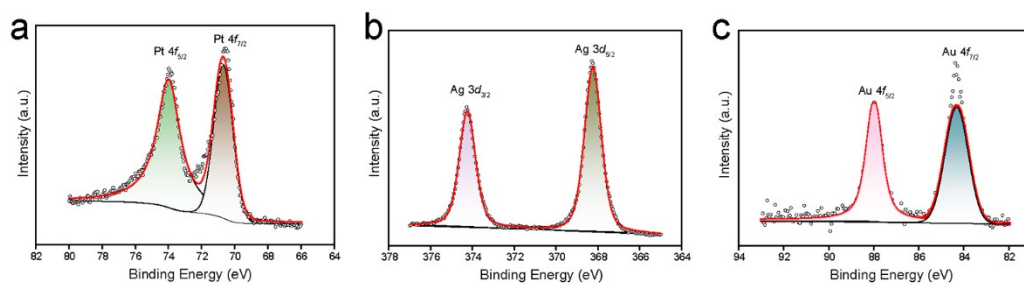

**Fig. S12** High-resolution XPS spectra of H-RuO<sub>2</sub>@metals for Pt 4f, Ag 3d, and Au 4f.

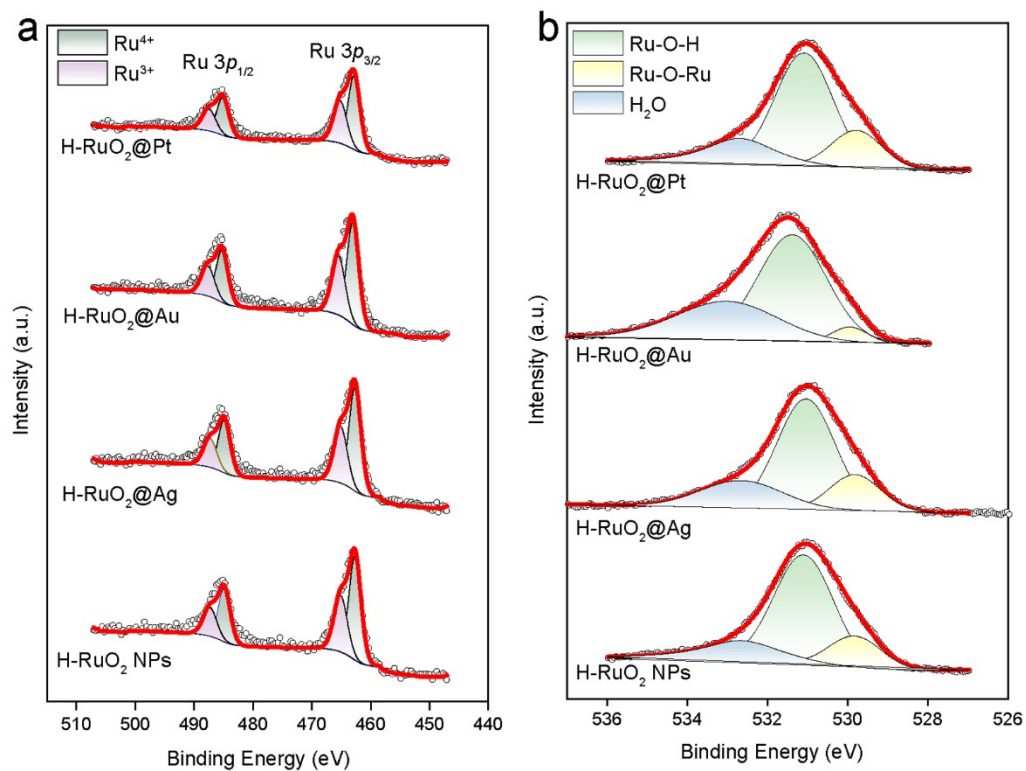

**Fig. S13** XPS spectra indicate the variation in the composition of the H-RuO<sub>2</sub> NPs after redox reactions. (a and b) Ru 3p and O 1s.

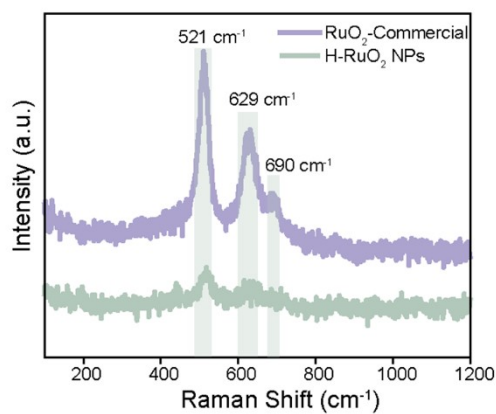

**Fig. S14** Raman spectra of hydrous and commercial RuO<sub>2</sub> NPs.

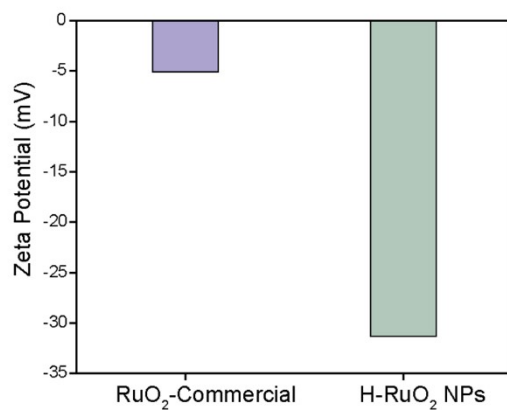

**Fig. S15** Zeta potentials of hydrous and commercial RuO<sub>2</sub> NPs determined in deionized water at a concentration of 100 µg/mL.

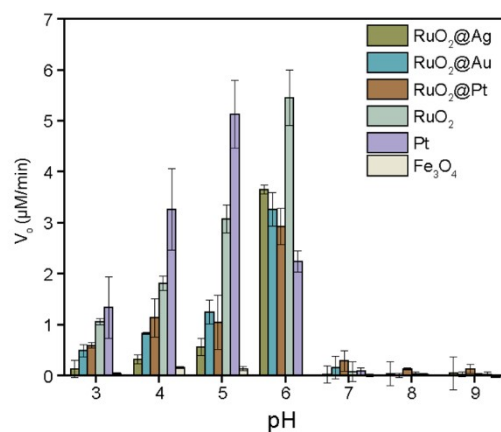

**Fig. S16** Peroxidase-like activities of H-RuO<sub>2</sub>, H-RuO<sub>2</sub>@Ag, H-RuO<sub>2</sub>@Au, and H-RuO<sub>2</sub>@Pt in different pH buffers, and were also compared with well-known peroxidase nanozymes (Fe<sub>3</sub>O<sub>4</sub> and Pt). The data are shown as means ± SD (n = 3).

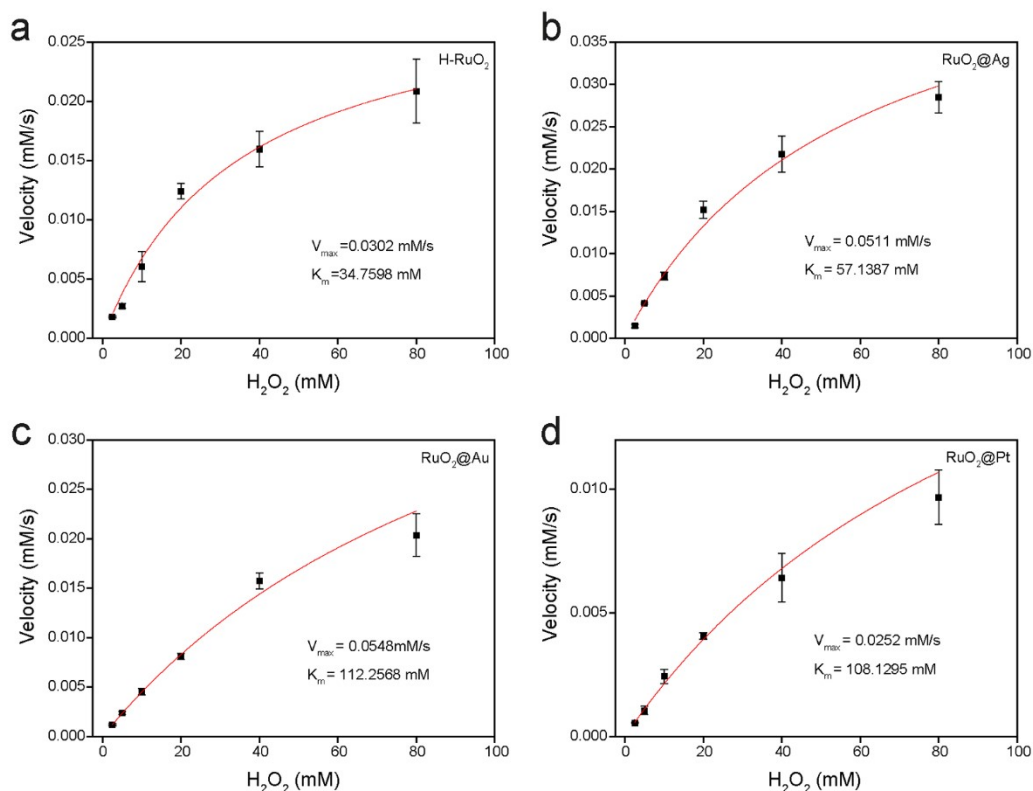

**Fig. S17** Catalase-like catalytic kinetics of H-RuO<sub>2</sub>, H-RuO<sub>2</sub>@Ag, H-RuO<sub>2</sub>@Au, and H-RuO<sub>2</sub>@Pt nanostructures. The concentration of H<sub>2</sub>O<sub>2</sub> was varied, and the initial reaction velocity (V) was monitored in PBS solution (pH 7.0) at 37 °C. The data are shown as means ± SD (n = 3).

$K_m$  value shows the affinity of a substrate to an enzyme, lower  $K_m$  signifies the higher affinity of H<sub>2</sub>O<sub>2</sub> towards nanozymes. The observed lower  $K_m$  values for H-RuO<sub>2</sub> and H-RuO<sub>2</sub>@Ag relative to H-RuO<sub>2</sub>@Pt and H-RuO<sub>2</sub>@Au show a higher affinity of H<sub>2</sub>O<sub>2</sub> towards silver and hydrous RuO<sub>2</sub> due to the presence of greater amount of oxygen vacancies in H-RuO<sub>2</sub> and higher oxidation susceptibility of Ag compared to Au and Pt. The differences between the  $V_{max}$  values were not so appreciable, and the values were found between 0.025-0.055mM/s, which is in agreement with the results shown in Figure 5b.



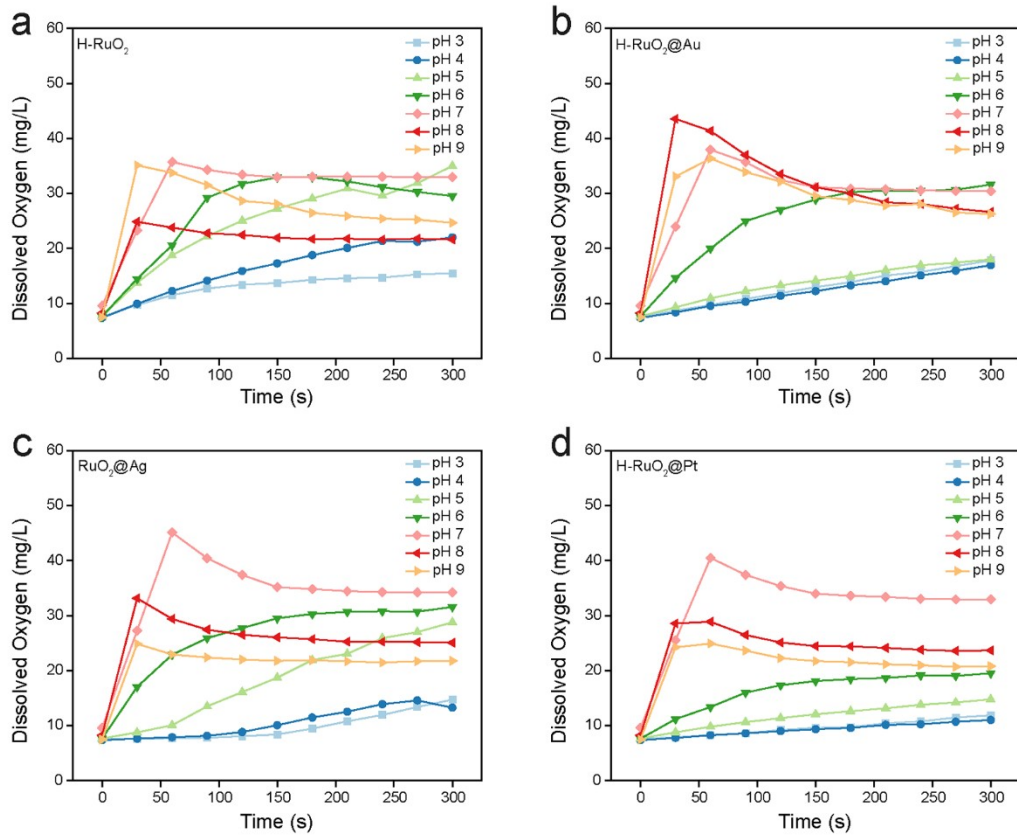

**Fig. S18** Catalase-like activities of H-RuO<sub>2</sub>, H-RuO<sub>2</sub>@Ag, H-RuO<sub>2</sub>@Au, and H-RuO<sub>2</sub>@Pt in different pH buffers. The data are shown as means ± SD (n = 3).

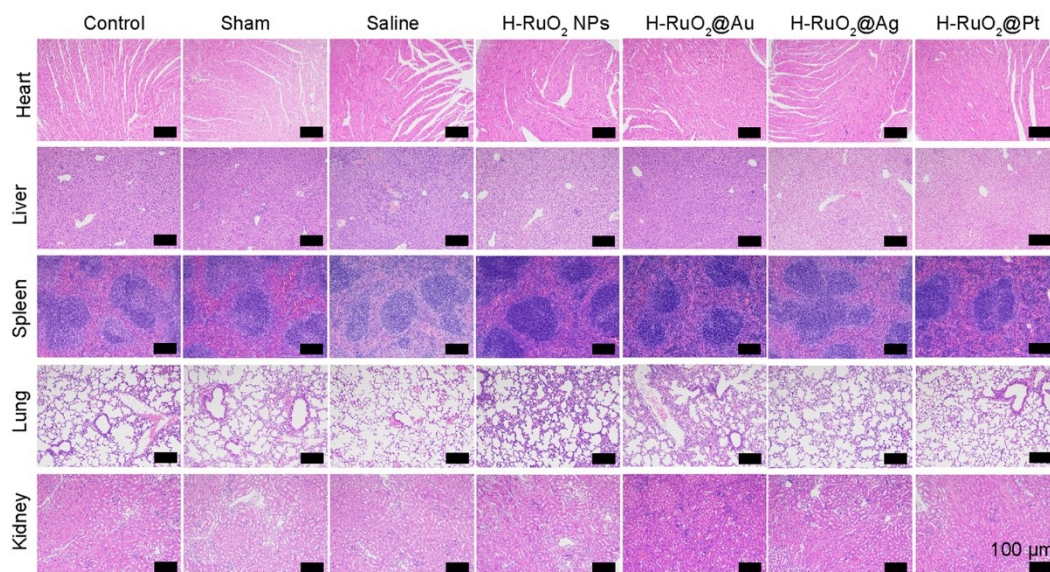

**Fig. S19** Hematoxylin and eosin (H&E)-stained histological sections of different organs of mice from the indicated groups on day 12 in CD model. Scale bar 100  $\mu\text{m}$ .

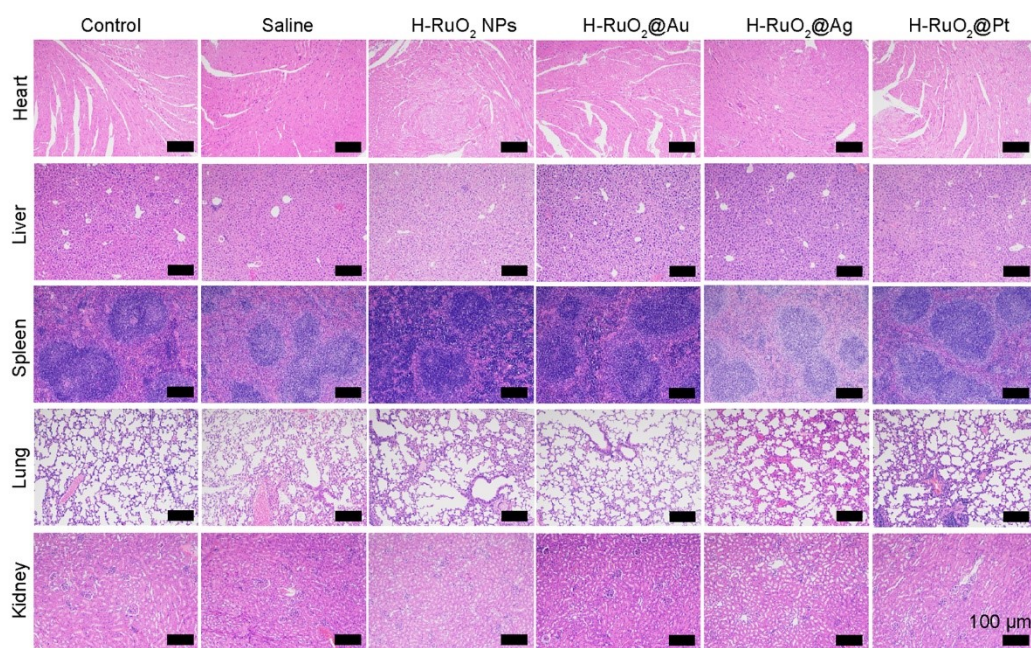

**Fig. S20** Hematoxylin and eosin (H&E)-stained histological sections of different organs of mice from the indicated groups on day 10 in UC model. Scale bar 100  $\mu\text{m}$ .

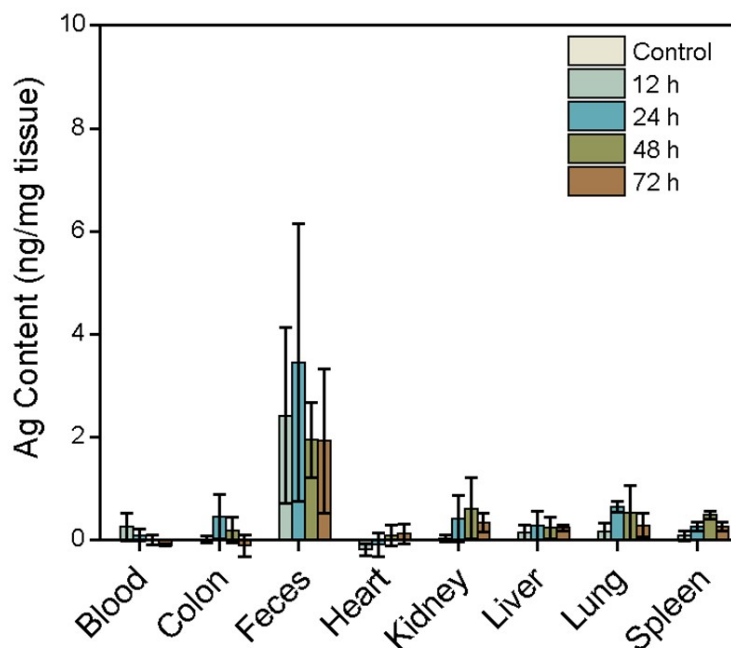

**Fig. S21** Biodistribution of H-RuO<sub>2</sub>@Ag in mouse tissues, as assessed by ICP–OES. The data are shown as means ± SD (n = 5).

To evaluate the biodistribution and biodegradation of RuO<sub>2</sub>@metal nanostructures, we orally administered H-RuO<sub>2</sub> and H-RuO<sub>2</sub>@Ag. Following different periods (12, 24, 48, and 72 h), the mice were sacrificed, and their blood, feces, heart, liver, spleen, lung, kidney, and colon were collected. The collected samples were dissolved in concentrated nitric acid at 150 °C, and the filtered solutions were analyzed using ICP–OES. However, Ru<sup>3+</sup> could not be detected, most likely due to the inability of ruthenium to make a stable compound with nitric acid (ruthenium nitrate). Ruthenium only chemically exists with nitrate in the form of ruthenium(III) nitrosyl nitrate, and even for the synthesis of ruthenium(III) nitrosyl nitrate, very specified conditions are needed (by just mixing with nitric acid ruthenium(III), nitrosyl nitrate cannot be formed). In another attempt, we tried to dissolve the collected samples in aqua regia (HCl+HNO<sub>3</sub>) but again failed to detect ruthenium due to difficulty in dissolving tissues. Finally, we indirectly determined the biodistribution and biodegradation in terms of Ag content in different organs using ICP–OES.

**Table S1.** Summary of measured energies (in eV) derived from UPS spectra for commercial and hydrous RuO<sub>2</sub> NPs.

|                                   | <b>Work function</b> | <b>Valence band</b> | <b>Valence band maximum</b> | <b>Band gap</b> | <b>Conduction band minimum</b> |
|-----------------------------------|----------------------|---------------------|-----------------------------|-----------------|--------------------------------|
| <b>RuO<sub>2</sub> NPs</b>        | 4.257                | 0.579               | -4.836                      | 2.52            | -2.317                         |
| <b>Commercial RuO<sub>2</sub></b> | 4.735                | 1.185               | -5.92                       | 1.95            | -3.973                         |

**Table S2.** Primer sequences used in qPCR analysis.

| <b>Genes</b>                   | <b>Forward sequences (5'-3')</b> | <b>Reverse sequences (5'-3')</b> |
|--------------------------------|----------------------------------|----------------------------------|
| <b>TNF-<math>\alpha</math></b> | ACTCCAGGCGGTGCCTATGT             | GTGAGGGTCTGGCCATAGAA             |
| <b>IL-1<math>\beta</math></b>  | TCCAGGATGAGGACATGAGCAC           | GAACGTCACACACCAGCAGGTTA          |
| <b>IL-6</b>                    | CCACTTCACAAGTCGGAGGCTTA          | TGCAAGTGCATCATCGTTGTTC           |
| <b>IL-10</b>                   | ATGCTGCCTGCTCTTACTGACTG          | CCCAAGTAACCCTTA AAGTCCTGC        |
| <b>TGF-<math>\beta</math></b>  | CTTCAGCCTCCACAGAGAAGAACT         | TGTGTCCAGGCTCCAAATATAG           |
| <b>Arg-1</b>                   | TGTGTCCAGGCTCCAAATATAG           | AGCAGGTAGCTGAAGGTCTC             |
| <b>GAPDH</b>                   | TGGCCTCCGTGTTCTCTAC              | GAGTTGCTGTTGAAGTCGCA             |

## References

- [1] S. Zhao, Y. Li, Q. Liu, S. Li, Y. Cheng, C. Cheng, Z. Sun, Y. Du, C. J. Butch, H. Wei, *Adv. Funct. Mater.* 2020, **30**, 2004692.
- [2] Y. Cheng, C. Cheng, J. Yao, Y. Yu, Y. Liu, H. Zhang, L. Miao, H. Wei, *Adv. Ther.* 2021, **4**, 2100081.
- [3] L. Wang, L. Yan, L. Ye, J. Chen, Y. Li, Q. Zhang, C. Jing, *JACS Au* 2022, **2**, 1435-1442.
- [4] T. Kayama, K. Yamazaki, H. Shinjoh, *J. Am. Chem. Soc.* 2010, **132**, 13154-13155.
